# Supplementary material
Source: PubMed Central journal article supplement (PMC3512405)
Supplement: embor2012162s2.pdf [file embor2012162s2.pdf]

Manuscript EMBOR-2012-36334

**Reactive oxygen species regulate ERBB2 and ERBB3 expression via miR-199a/125b and DNA methylation**

Jun He, Qing Xu, Yi Jing, Faton Agani, Xu Qian, Richard Carpenter, Qi Li, Xin-Ru Wang, Stephen S. Peiper, Zhimin Lu, Ling-Zhi Liu and Bing-Hua Jiang

*Corresponding author: Bing-Hua Jiang, Thomas Jefferson University*

---

**Review timeline:**

Submission date:

28 June 2012

Accepted:

08 October 2012

---

**Transaction Report:**

No Peer Review Process File is available with this article, as the authors have chosen not to make the review process public in this case.
